# Supplementary material
Source: PubMed Central journal article supplement (PMC8650761)
Supplement: NIHMS1742234-supplement-2.pdf [file NIHMS1742234-supplement-2.pdf]

Figure S1

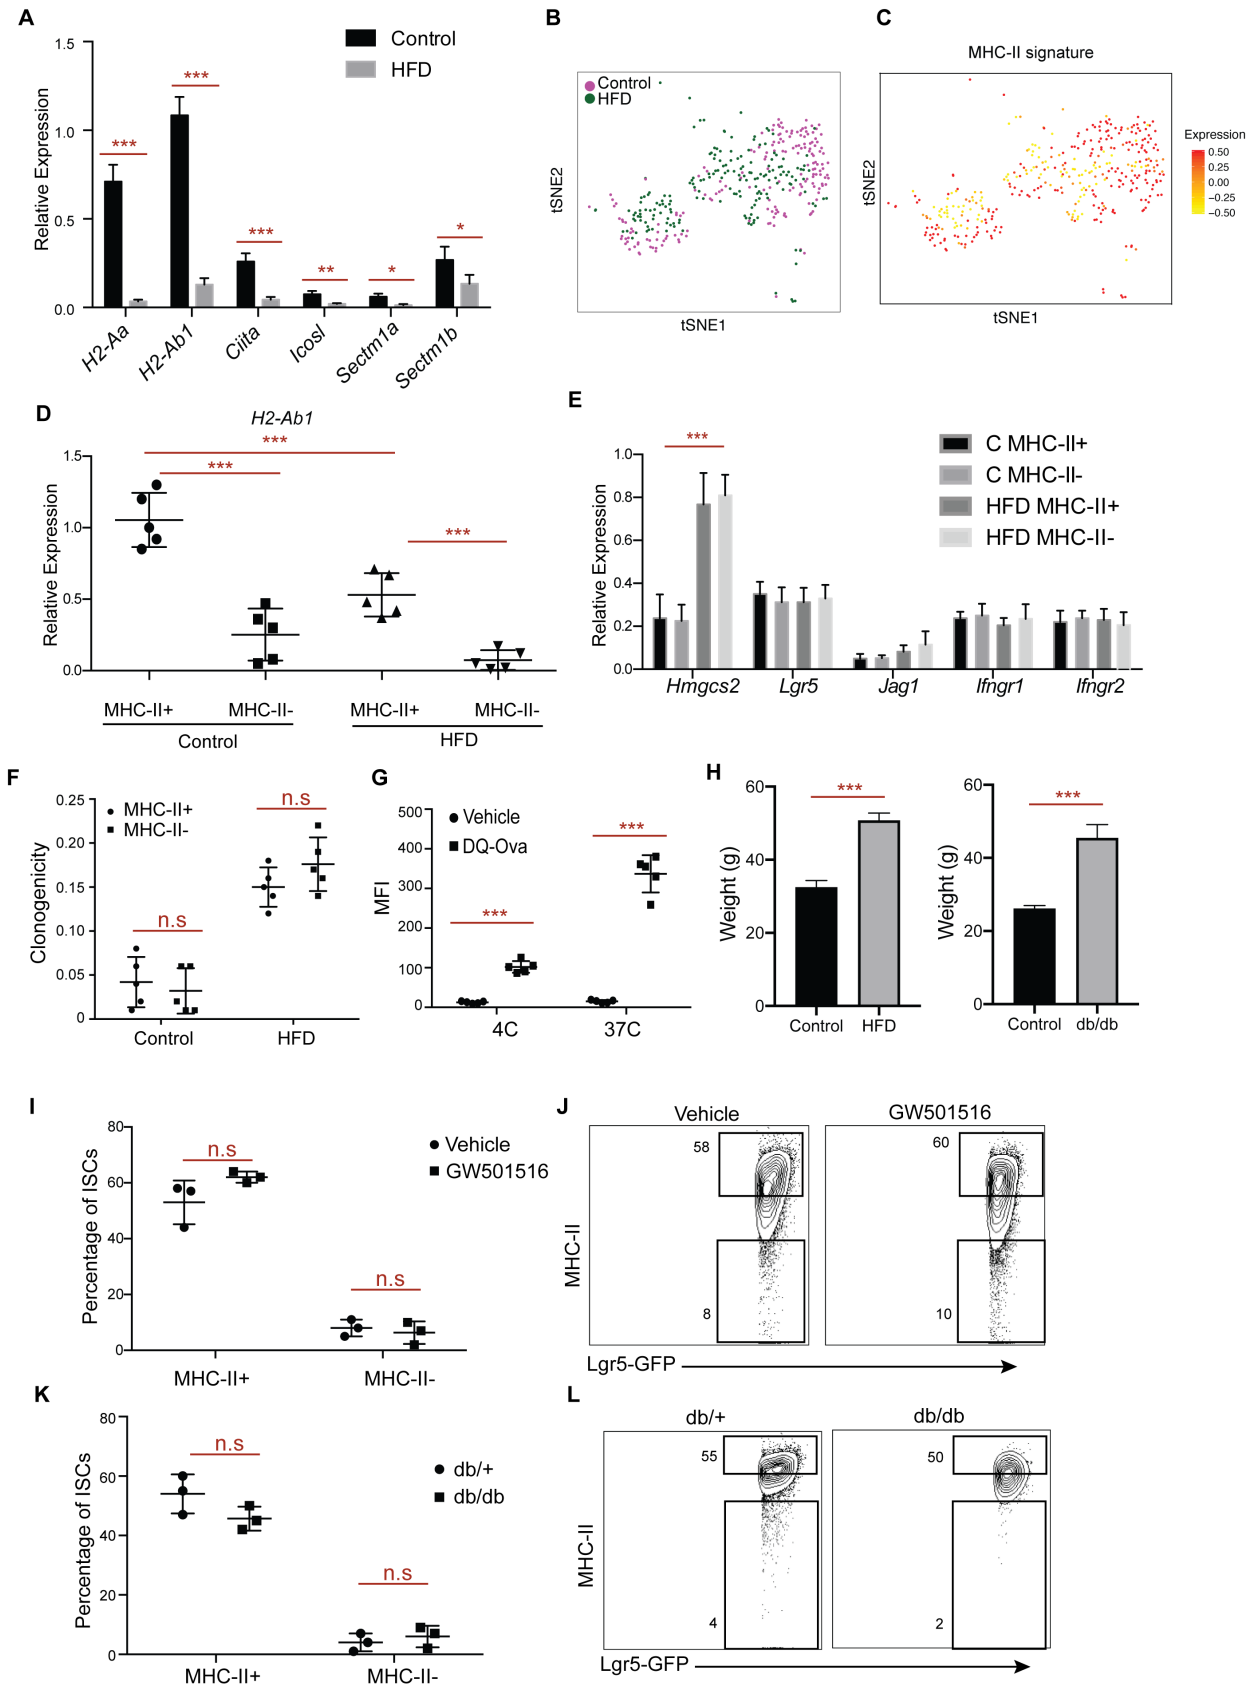

## Supplementary Figure 1. Characterization of MHC-II expression in ISCs, related to Figure 1.

- A.** Relative expression of immunomodulatory genes in control and HFD Lgr5+ ISCs ( $n=5$ ).
- B.** *t*-Distributed stochastic neighbour embedding (tSNE) analysis of single Lgr5+ ISCs isolated from control ( $n=171$  cells, 2 independent experiments) or HFD mice ( $n=144$  cells, 2 independent experiments).
- C.** tSNE analysis of single cells using MHC-II pathway signature genes (Supplementary Table 1)
- D.** Relative expression of MHC-II (*H2-Ab1*) in control and HFD MHC-II+ and MHC-II- Lgr5+ ISCs ( $n=5$ ).
- E.** Relative expression of signature PPAR- $\delta$  target (*Hmgcs2*), stem cell marker (*Lgr5*), PPAR- $\delta$  - dependent B-catenin target (*Jag1*) and IFNGR genes in control and HFD MHC-II+ and MHC-II- Lgr5+ ISCs ( $n=5$ ).
- F.** Organoid-initiating capacity of MHC-II+ and MHC-II- Lgr5+ ISCs from HFD mice ( $n=5$ ).
- G.** Mean fluorescence intensity (MFI) of ISCs pulsed with either vehicle or DQ-Ovalbumin for 8 hours at 4C and 37C ( $n=5$ , 3 technical replicates per experiment).
- H.** Weight of mice used for diet-induced obesity (left: Control and HFD,  $n=15$ ) and leptin receptor deficiency models of obesity (right, Control and db/db,  $n=7$ ) in the study.
- I, J.** Frequency of MHC-II+ and MHC-II- Lgr5+ ISCs in vehicle- and PPAR- $\delta$  agonist GW501516-treated mice by flow cytometry (**I**,  $n=3$ ). Representative flow cytometry plots of MHC-II in vehicle- and PPAR- $\delta$  agonist GW501516-treated Lgr5+ ISCs (**J**).
- K, L.** Frequency of MHC-II+ and MHC-II- Lgr5+ ISCs in lean db/+ and obese db/db mice (**K**,  $n=3$ ). Representative flow cytometry plots of MHC-II+ and MHC-II- Lgr5+ ISCs (**L**,  $n=3$ ).
- Unless otherwise indicated, data are mean  $\pm$  s.d. from  $n$  independent experiments; n.s.: not significant, \* $P < 0.05$ , \*\* $P < 0.01$ , \*\*\* $P < 0.001$  (Student's *t*-tests).
- Related to Figure 1.

Figure S2

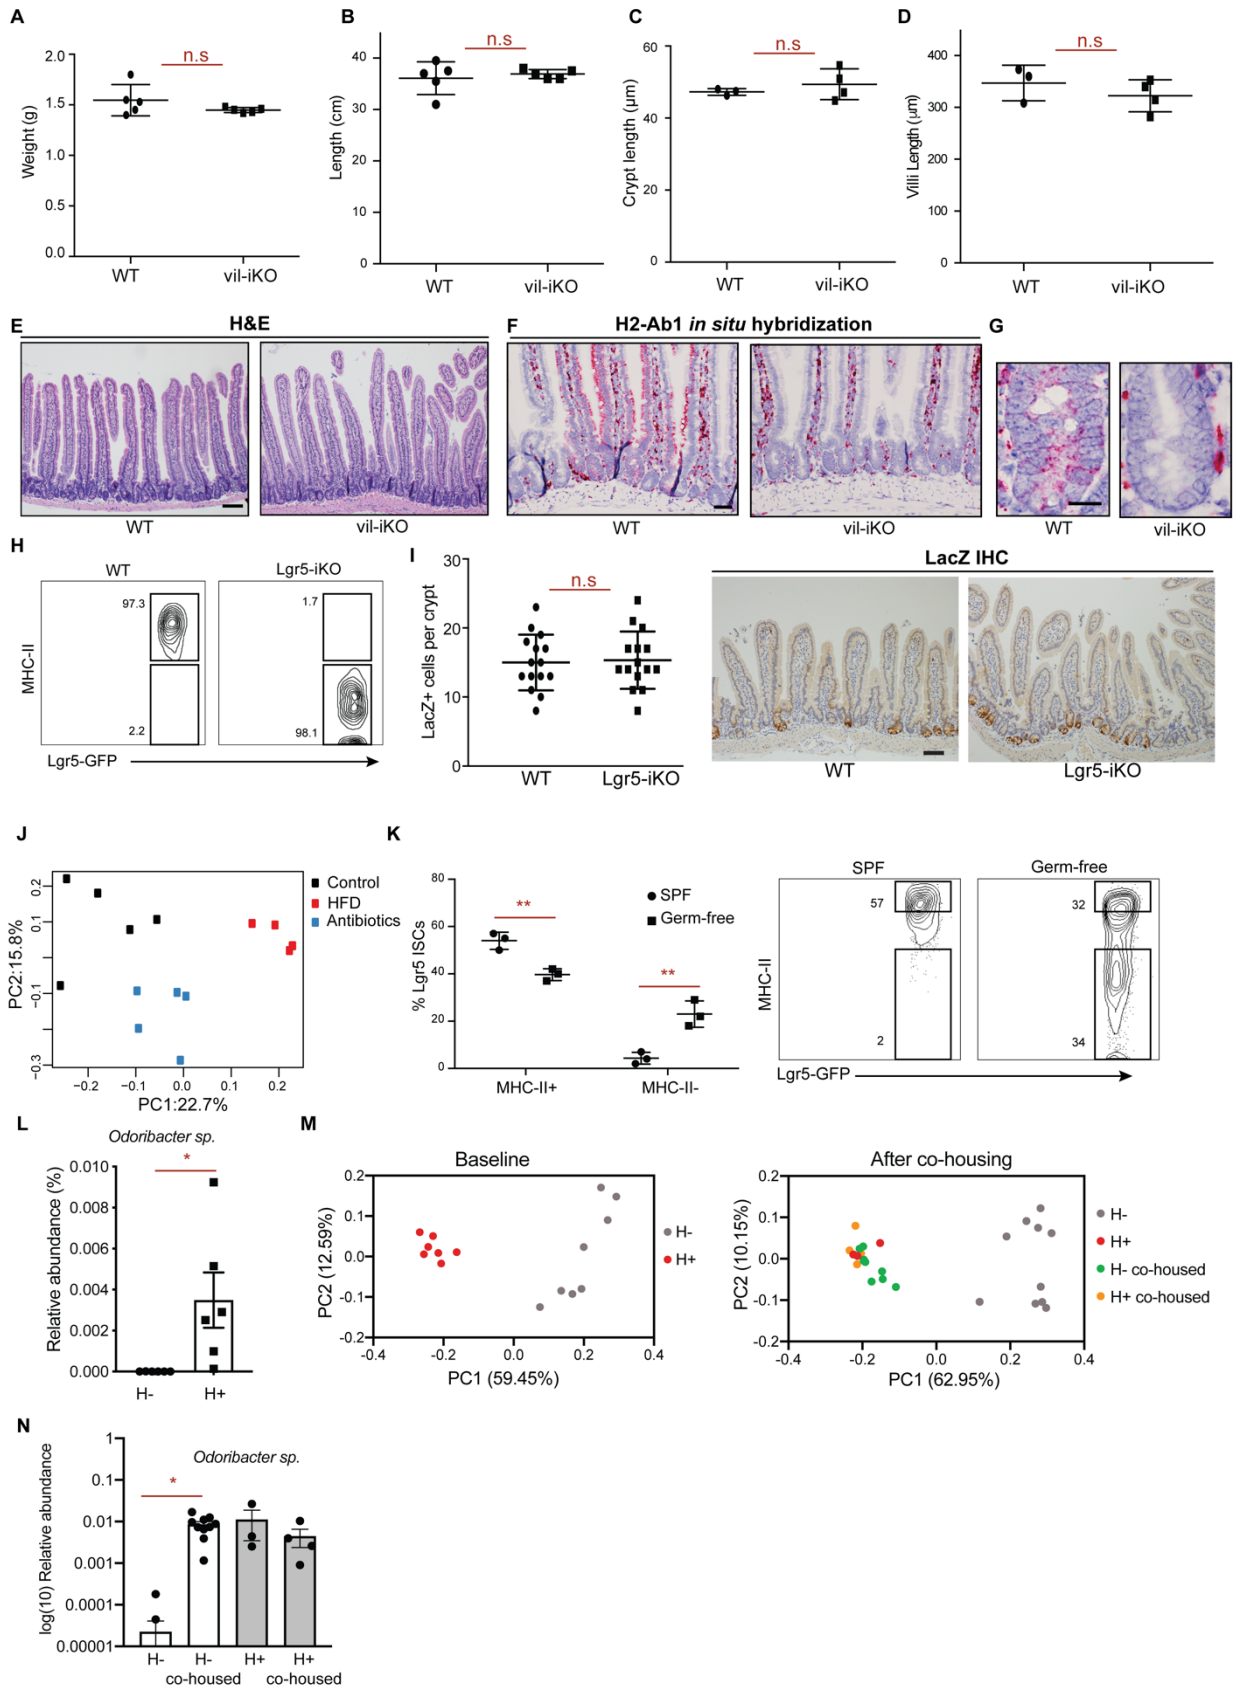

**Supplementary Figure 2. Intestine-specific deletion of MHC-II does not alter intestinal physiology and microbiome regulates epithelial MHC-II expression, related to Figures 2, 3 and 4.**

**A-E**, Intestinal weight (**A**,  $n=5$ ), length (**B**,  $n=5$ ), crypt (**C**,  $n=5$ ), and villi length (**D**,  $n=5$ ) of MHC-II wild type (WT) and MHC-II<sup>L/L</sup>; Villin-CreERT2 (vil-iKO) mice one month after tamoxifen injection ( $n=$  mice, mean  $\pm$  s.d.). Representative H&Es of WT and vil-iKO small intestine (**E**).

**F, G**, *In situ* hybridization for *H2-Ab1* in the intestine (**F**) and representative images of intestinal crypts (**G**) in WT and vil-iKO mice ( $n=3$ ).

**H**, Frequencies of MHC-II<sup>+</sup> and MHC-II- Lgr5<sup>+</sup> ISCs in WT and MHC<sup>L/L</sup>; Lgr5-CreERT2 (Lgr5-iKO) by flow cytometry ( $n=5$  mice).

**I**, Lineage tracing of LacZ<sup>+</sup> cells in the intestinal crypt after deletion of MHC-II in ISCs (left). Representative images of LacZ immunostain in WT and Lgr5-iKO small intestine (right) ( $n=5$  mice).

**J**, Principal coordinate analysis (PCoA) of microbial composition in feces of mice fed control diet, HFD, and mice treated with antibiotics ( $n=5$  mice).

**K**, Frequencies of MHC-II<sup>+</sup> and MHC-II- Lgr5<sup>+</sup> ISCs in specific-pathogen free (SPF) and germ-free mice by flow cytometry ( $n=3$ , mean  $\pm$  s.d.). Representative flow cytometry plots of MHC-II in SPF and germ-free ISCs.

**L**, Relative abundance of *Odoribacter sp.* in mice housed in H- room or H+ room ( $n=6$ , mean  $\pm$  s.e.m).

**M**, PCoA of microbial composition in feces at baseline level before co-housing experiment (left) and 10 days after co-housing H- mice with H+ mice in the H+ room.

**N**, Relative abundance of *Odoribacter sp.* in feces of mice housed either in H- room ( $n=10$ ), H+ room ( $n=3$ ), or after co-housing H- mice ( $n=10$ ) with H+ mice ( $n=4$ ) in H+ room (mean  $\pm$  s.e.m).

n.s.: not significant, \* $P < 0.05$ , \*\* $P < 0.01$  (Student's *t*-tests). Scale bars, 100  $\mu$ m (**E**), 50  $\mu$ m (**F, I**) and 20  $\mu$ m (**G**).

Figure S3

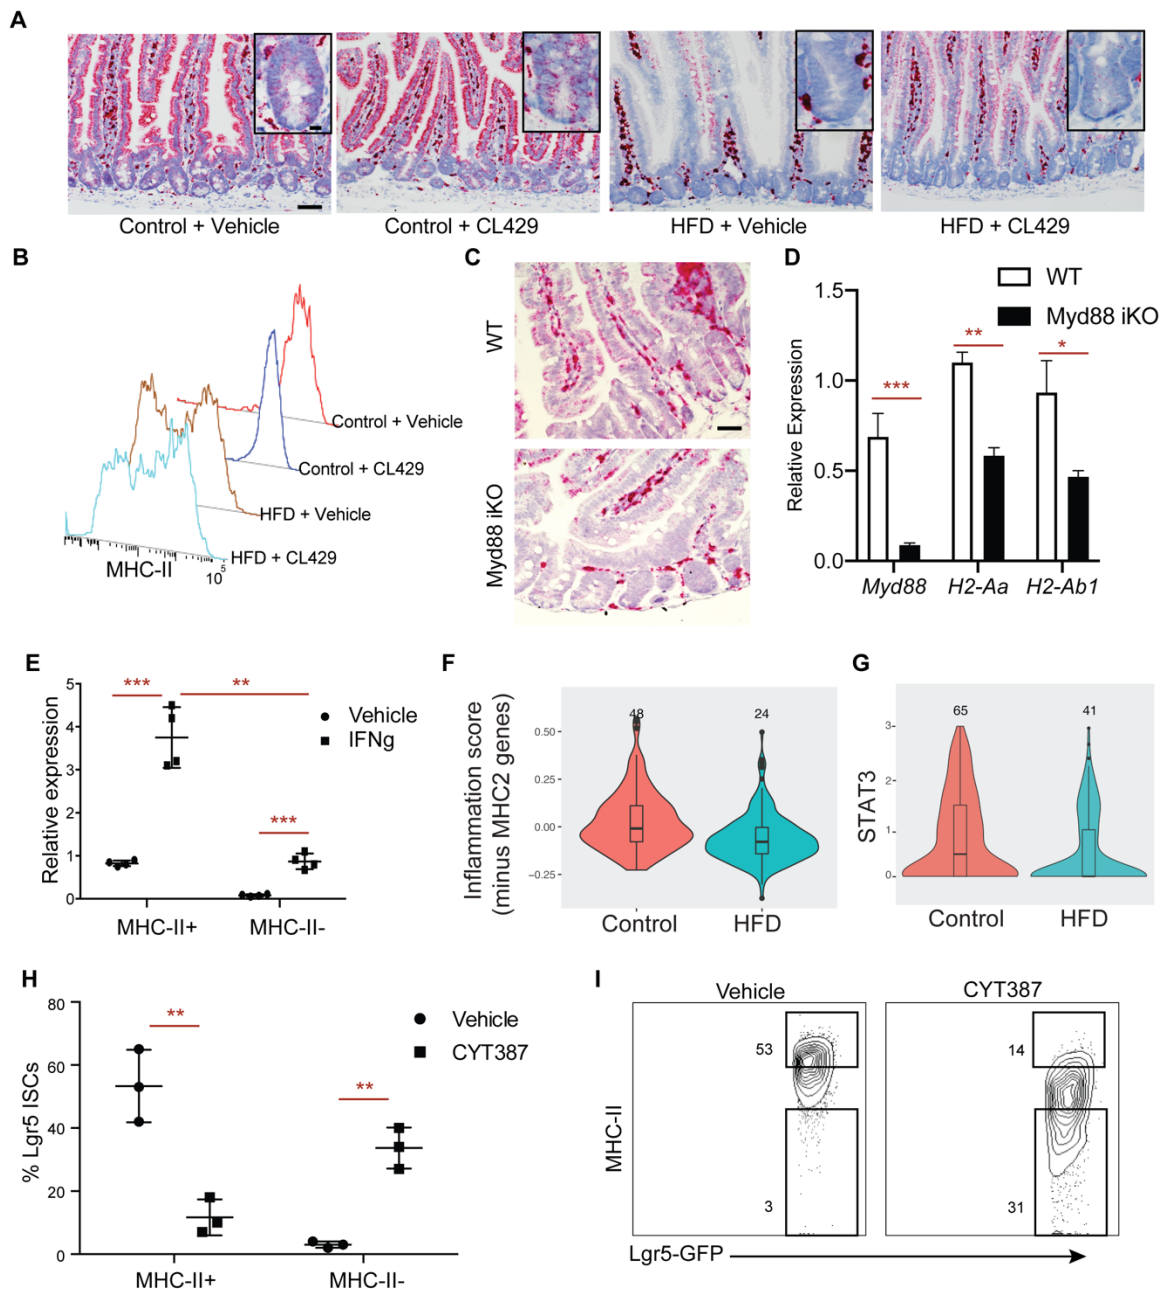

**Supplementary Figure 3. Regulation of MHC-II expression in ISCs by PRR and IFN $\gamma$  signaling, related to Figure 5.**

**A, B.** *In situ* hybridization for H2-Ab1 in control and HFD mice treated with vehicle- and CL429-treated mice in proximal small intestine (**A**,  $n=3$ ). Representative histogram plots of MHC-II in Lgr5<sup>+</sup> ISCs in control and HFD mice treated with vehicle and CL429 (**B**,  $n=3$ ).

**C.** *In situ* hybridization for H2-Ab1 in WT and Myd88 KO mice ( $n=4$ ).

**D.** Relative expression of *Myd88* and MHC-II genes (*H2-Aa* and *H2-Ab1*) in the intestine from WT and Myd88 KO mice ( $n=5$ , mean  $\pm$  s.d.).

**E.** Relative expression of MHC-II (*H2-Ab1*) in MHC-II<sup>+</sup> and MHC-II<sup>-</sup> Lgr5<sup>+</sup> ISCs isolated from HFD mice with or without IFN $\gamma$  stimulation ( $n=4$ , mean  $\pm$  s.d.).

**F.** Violin plots demonstrating the levels of IFN $\gamma$ -induced genes excluding MHC-II pathway genes in control and HFD Lgr5<sup>+</sup> ISCs by scRNA-seq.

**G.** Violin plots demonstrating the levels of STAT3 in control and HFD Lgr5+ ISCs by scRNA-seq.

**H, I.** Frequencies of MHC-II+ and MHC-II- Lgr5+ ISCs in vehicle- and Jak/Stat inhibitor CYT387-treated mice ( $n=3$ ). Representative flow cytometry plots of MHC-II in vehicle- and CYT387-treated Lgr5+ ISCs (**I**).

Unless otherwise indicated, data are from  $n$  independent experiments; \* $P < 0.05$ , \*\* $P < 0.01$ , \*\*\* $P < 0.001$  (Student's  $t$ -tests). Scale bars, 50  $\mu\text{m}$  (**A, C**) and 20  $\mu\text{m}$  (insets, **A**).

Figure S4

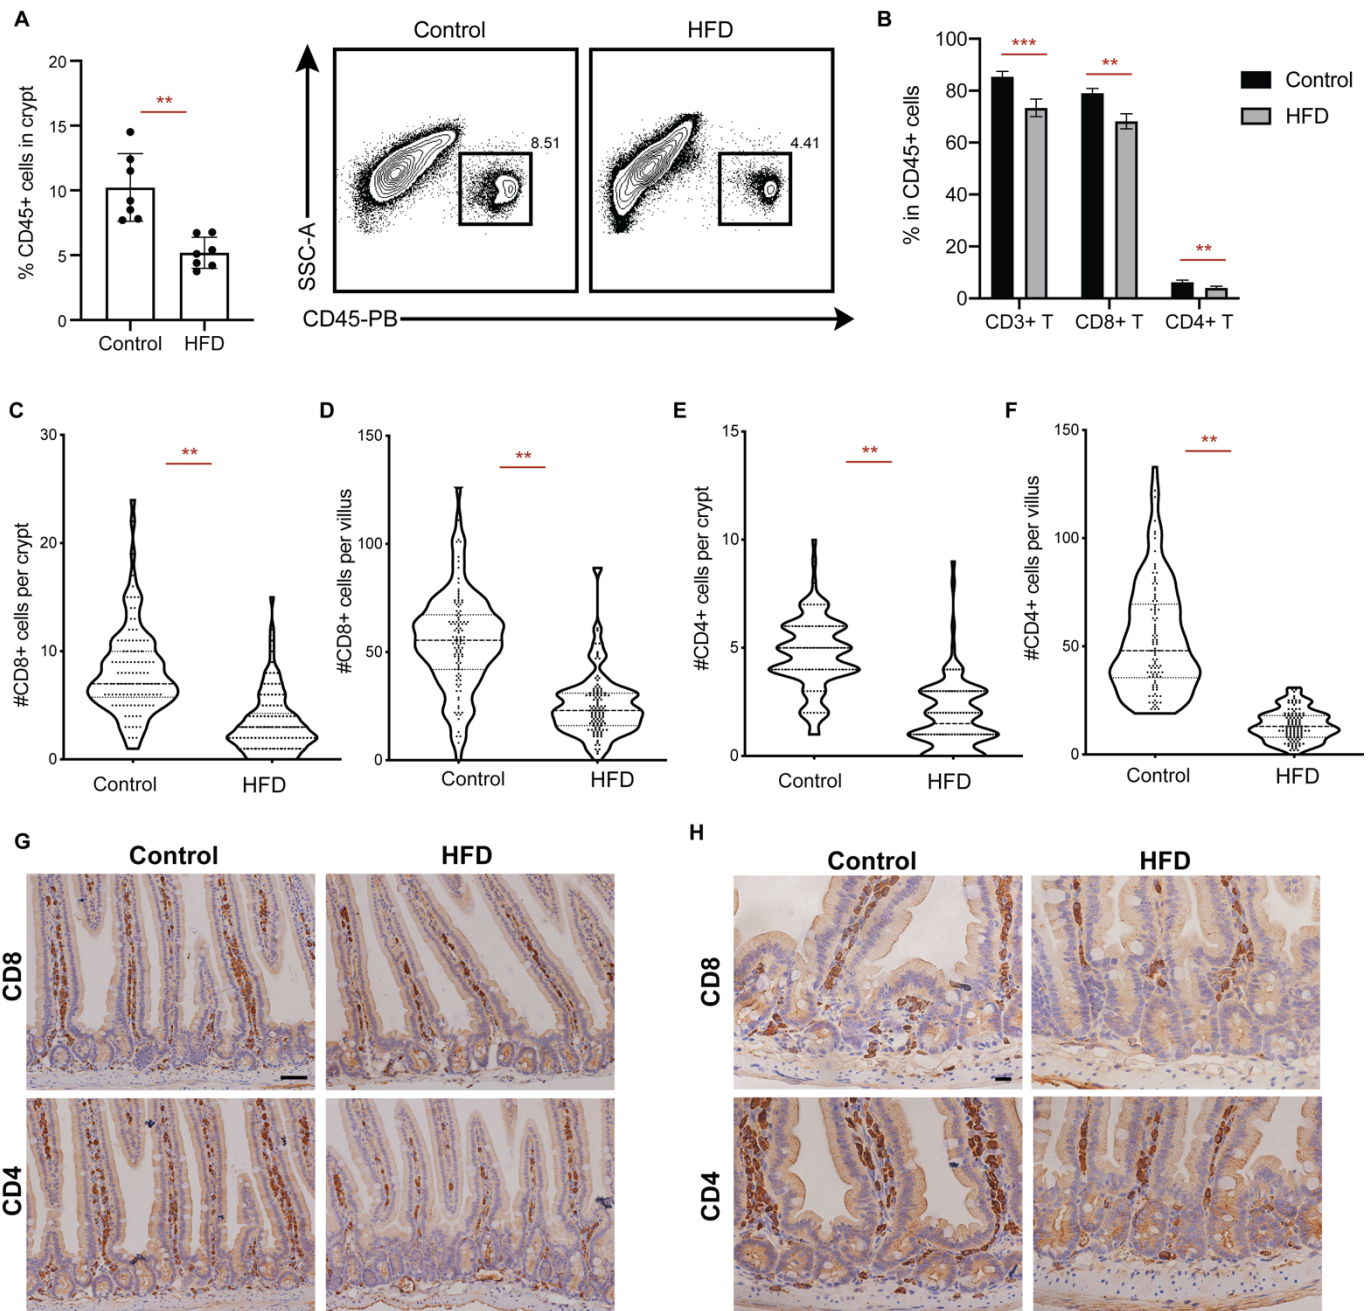

**Supplementary Figure 4. The effect of HFD on intestinal immune cells, related to Figure 5.**

**A.** Frequency of CD45+ cells in intestinal crypts isolated from control or HFD mice ( $n=7$ ).

**B.** Frequency of CD3+ T cells, CD8+ T cells and CD4+ T cells among CD45+ cells in intestinal crypts isolated from control or HFD mice ( $n=5$ ).

**C-H.** Numbers of CD8+ cells (**C**, crypt; **D**, villus) and CD4+ cells (**E**, crypt; **F**, villus) in the intestines of control or HFD mice. Representative images of CD4 and CD8 immunostaining in control or HFD intestines (**G**, **H**) ( $n=5$ ).  $**P < 0.01$ ,  $***P < 0.001$  (Student's  $t$ -tests). Scale bars, 50  $\mu\text{m}$  (**G**) and 20  $\mu\text{m}$  (**H**).

Figure S5

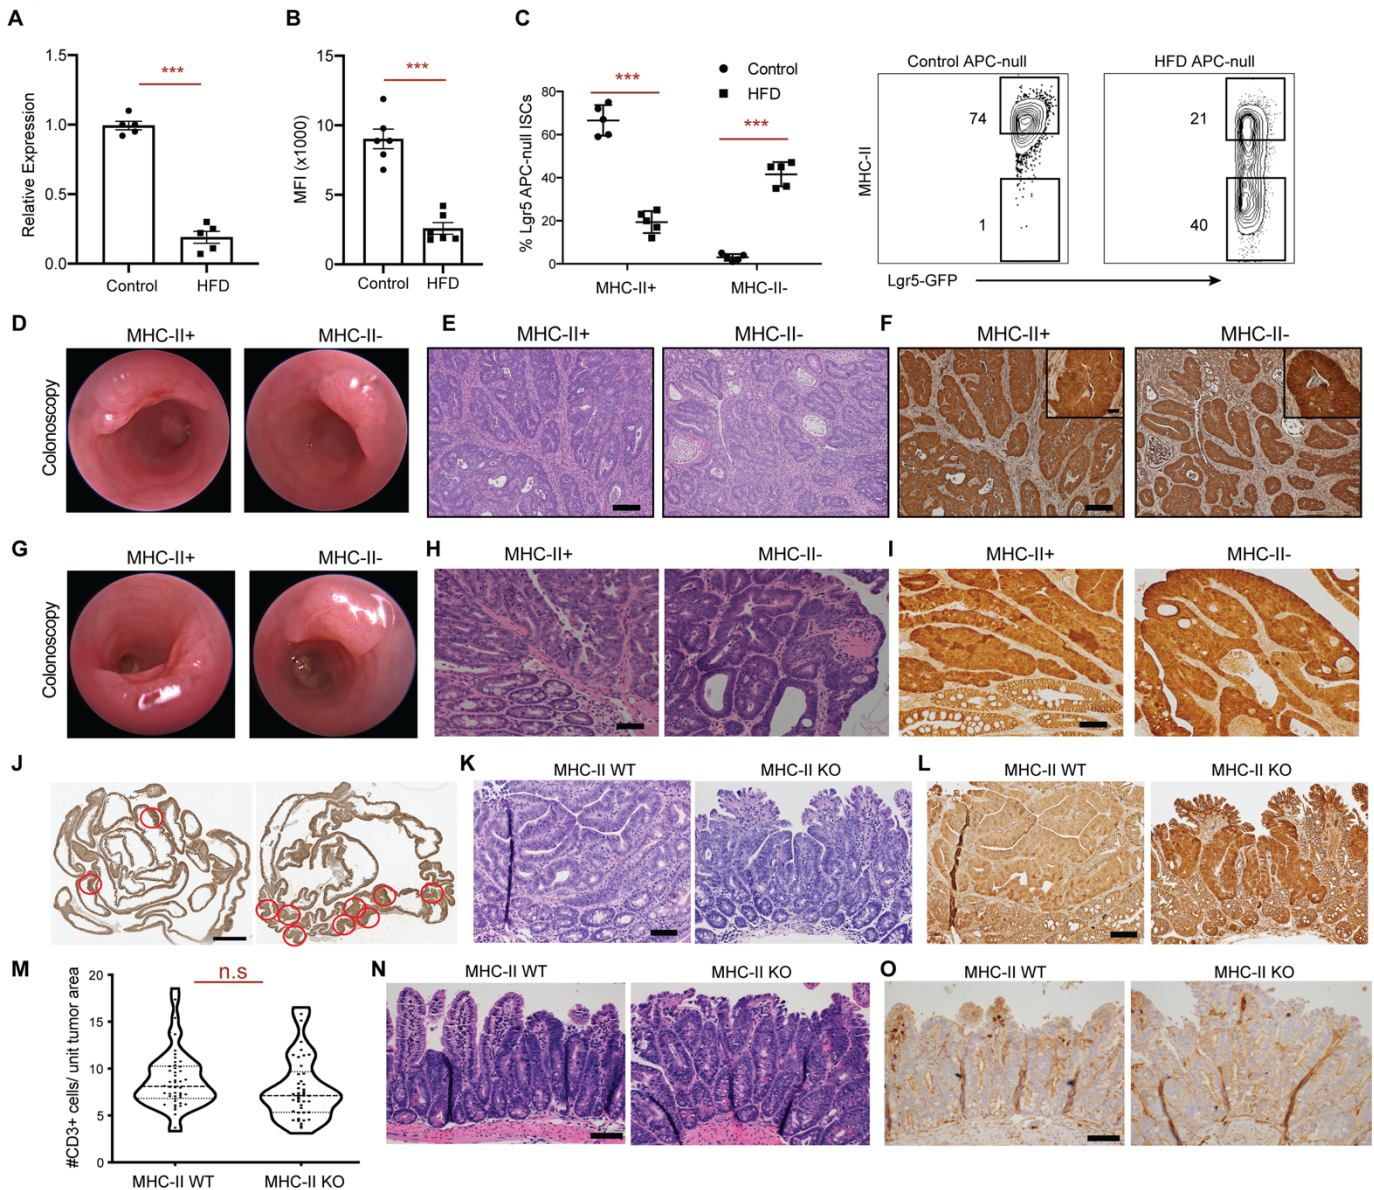

**Supplementary Figure 5. The effect of Lgr5+ ISC MHC-II expression on tumor formation, related to Figure 6.**

**A.** Relative expression of MHC-II (*H2-Ab1*) in Lgr5+ *Apc*-null pre-malignant ISCs isolated from control or HFD mice 3 days post tamoxifen injection ( $n=5$ ).

**B.** Mean fluorescence intensity (MFI) of MHC-II in Lgr5+ *Apc*-null pre-malignant ISCs isolated from control or HFD mice 3 days post tamoxifen injection ( $n=6$ ).

**C.** Frequency of MHC-II+ and MHC-II- Lgr5+ *Apc*-null ISCs in control and HFD mice by flow cytometry ( $n=5$ ). Representative flow cytometry plots of MHC-II in HFD *Apc*-null ISCs.

**D-F.** Characterization of orthotopically transplanted MHC-II+ and MHC-II- *Apc*-null Lgr5+ ISC-derived tumors three months after transplantation into immunocompetent syngeneic hosts. Optical colonoscopy images (**D**), Hematoxylin and eosin (**E**) and beta-catenin immunostain (**F**) of tumors.

**G-I.** Characterization of orthotopically transplanted MHC-II+ and MHC-II- *Apc*-null Lgr5+ ISC-derived tumors three months after transplantation into immunodeficient Rag2-KO hosts. Optical colonoscopy images (**G**), H&E (**H**) and beta-catenin immunostain (**I**) of tumors.



**J-L.** Tumors in Lgr5-CreERT2 MHC-II<sup>L/+</sup>, APC<sup>L/+</sup> ( $n=9$ , MHC-II WT APC-het) and Lgr5-CreERT2 MHC-II<sup>L/L</sup>, APC<sup>L/+</sup> ( $n=9$ , MHC-II KO APC-het). Representative images of tumors that arise in MHC-II WT (**J**, left) and MHC-II KO (**J**, right) mice. Representative H&E (**K**) and beta-catenin immunostain (**L**) images from tumors in MHC-II WT and MHC-II KO mice.

**M-O.** Numbers of CD3+ T cells per tumor area (**M**). Representative H&E (**N**) and CD3 immunostain (**O**) images from tumors ( $n=5$ ). n.s.: not significant,  $***P < 0.001$  (Student's *t*-tests). Scale bars, 100  $\mu\text{m}$  (**E**, **F**, **H**, **I**, **K**, **L**, **N**, **O**) and 20  $\mu\text{m}$  (insets, **F**).

Figure S6

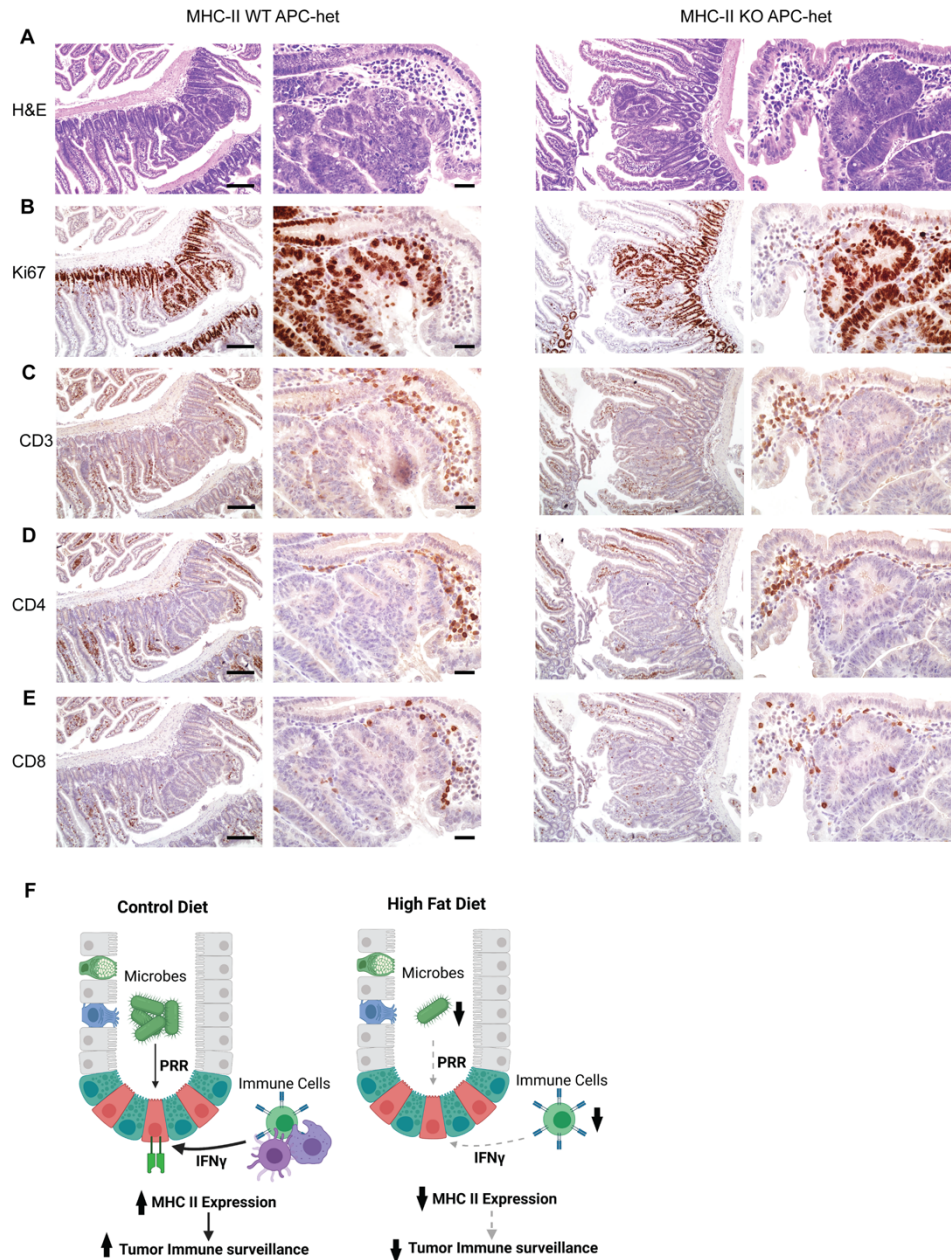

**Supplementary Figure 6. Immune cell profile of tumors that arise upon intestine specific deletion of MHC-II and *Apc*, related to Figure 6.**

**A-E.** Representative H&E (A), Ki67 (B), CD3 (C), CD4 (D) and CD8 (E) immunostain images of tumors in *Lgr5-CreERT2 MHC-II<sup>L/+</sup>, APC<sup>L/+</sup>* (MHC-II WT APC-het) and *Lgr5-CreERT2 MHC-II<sup>L/L</sup>, APC<sup>L/+</sup>* (MHC-II KO APC-het) mice. Scale bars, 500  $\mu$ m (left, A – E), 100  $\mu$ m (right, A – E).

**F.** Model of dietary regulation of intestinal tumor initiation through perturbing microbe – stem cell – immune cell crosstalk. Intestinal microbiome, Pattern Recognition Receptor (PRR) and IFN  $\gamma$  signaling regulate epithelial MHC-II expression and tumor immune surveillance in control diet fed mice (left). A HFD leads to microbial dysbiosis and dampened MHC-II expression that results in impaired tumor immune surveillance and increased tumor initiation.

**Supplementary Table S1:** The list of genes defining the stem cell MHC-II signature. Related to Figure 1.

|                            |
|----------------------------|
| Stem Cell MHC-II Signature |
| <i>H2-Ab1</i>              |
| <i>H2-DMb1</i>             |
| <i>H2-DMA</i>              |
| <i>H2-Aa</i>               |
| <i>CD74</i>                |
| <i>Ciita</i>               |
| <i>H2-Eb1</i>              |
| <i>Ceacam10</i>            |
| <i>Cd177</i>               |
| <i>Cd320</i>               |

**Supplementary Table S2:** The list of microbes that colonize mice in H+ room. Related to Figure 4.

|                                  | H- Room | H+ Room |
|----------------------------------|---------|---------|
| <i>Helicobacter spp.</i>         | -       | +       |
| <i>Helicobacter mastomyrinus</i> | -       | +       |
| <i>Helicobacter typhlonius</i>   | -       | +       |

**Supplementary Table S3:** The list of qRT-PCR primers. Related to the STAR Methods.

|                                      |
|--------------------------------------|
| TLR1(F): TGAGGGTCCTGATAATGTCCTAC     |
| TLR1(R): AGAGGTCCAAATGCTTGAGGC       |
| TLR2(F): GCAAACGCTGTTCTGCTCAG        |
| TLR2(R): AGGCGTCTCCCTCTATTGTATT      |
| TLR3(F): GTGAGATACAACGTAGCTGACTG     |
| TLR3(R): TCCTGCATCCAAGATAGCAAGT      |
| TLR4(F): ATGGCATGGCTTACACCACC        |
| TLR4(R): GAGGCCAATTTTGTCTCCACA       |
| TLR5(F): GCAGGATCATGGCATGTCAAC       |
| TLR5(R): ATCTGGGTGAGGTTACAGCCT       |
| TLR6(F): TGAGCCAAGACAGAAAACCCA       |
| TLR6(R): GGGACATGAGTAAGGTTCTGTT      |
| TLR7(F): ATGTGGACACGGAAGAGACAA       |
| TLR7(R): GGTAAGGGTAAGATTGGTGGTG      |
| TLR8(F): GAAAACATGCCCCCTCAGTCA       |
| TLR8(R): CGTCACAAGGATAGCTTCTGGAA     |
| TLR9(F): ATGGTTCTCCGTCGAAGGACT       |
| TLR9(R): GAGGCTTCAGCTCACAGGG         |
| Nod1(F): GAAGGCACCCCATTGGGTT         |
| Nod1(R): AATCTCTGCATCTTCGGCTGA       |
| Nod2(F): CAGGTCTCCGAGAGGGTACTG       |
| Nod2(R): GCTACGGATGAGCCAAATGAAG      |
| Sectm1a (F): TCAGTGCCTGCTATCCCTACC   |
| Sectm1a (R): GGGGCTTTTTATCGAAGATGGT  |
| Sectm1b (F): AGCCTCCCTGAATGCCTATAA   |
| Sectm1b (R): ACGTCTCTGAGATTGTTGGAGAT |
| Icosl (F): TAAAGTGTCCCTGTTTTGTGTCC   |
| Icosl (R): ATTGCACCGACTTCAGTCTCT     |
| Ifngr1 (F): CTGGCAGGATGATTCTGCTGG    |

Ifngr1 (R): GCATACGACAGGGTTCAAGTTAT  
Ifngr2 (F): TCCTCGCCAGACTCGTTTTTC  
Ifngr2 (R): GTCTTGGGTCATTGCTGGAAG  
Hmgcs2 (F): ATACCACCAACGCCTGTTATGG  
Hmgcs2 (R): CAATGTCACCACAGACCACCAG  
H2-Ab1 (F): AGCCCCATCACTGTGGAGT  
H2-Ab1 (R): GATGCCGCTCAACATCTTGC  
H2-Aa (F): TCAGTCGCAGACGGTGTTTAT  
H2-Aa (R): GGGGGCTGGAATCTCAGGT  
Jag1 (F): CCTCGGGTCAGTTTGAGCTG  
Jag1 (R): CCTTGAGGCACACTTTGAAGTA  
Lgr5 (F): CCTACTCGAAGACTTACCCAGT  
Lgr5 (R): GCATTGGGGTGAATGATAGCA
